# Supplementary material
Source: ML conference proceedings conference paper supplement (https://openreview.net/forum?id=HfiRzzmFt8)
Supplement: supplementary_material [file Literature_Overview.pdf › ICLRsupp/data_and_results/Literature_Overview.pdf]

Table 1: Literature Overview

| METHOD   | UNKNOWN TARGET<br>IDENTIFICATION | LIKELIHOOD<br>COMPLEXITY | DAG PENALTY<br>COMPLEXITY | SPACE<br>COMPLEXITY | DAG GUARANTEE<br>BY CONSTRUCTION |
|----------|----------------------------------|--------------------------|---------------------------|---------------------|----------------------------------|
| DCDI     | PARTIAL                          | $O(n^2)$                 | $O(n^3)$                  | $O(n^2)$            | No                               |
| DCDFG    | No                               | $O(mn)$                  | $O(mn)$                   | $O(mn)$             | No                               |
| ENCO     | No                               | $O(n^2)$                 | N/A                       | $O(n^2)$            | No                               |
| SDCD     | No                               | $O(n^2)$                 | $O(n^2)$                  | $O(n^2)$            | No                               |
| ABCDEFGF | Yes                              | $O(mn)$                  | N/A                       | $O(mn)$             | Yes                              |
